# Supplementary material
Source: PubMed Central journal article supplement (PMC7523171)
Supplement: neurintsurg-2020-016777supp001.pdf [file neurintsurg-2020-016777supp001.pdf]

**SUPPLEMENTAL MATERIAL****Supplementary Table I.** ICD codes used for patient identification.

| <b>Identifier</b> | <b>Category</b> | <b>Diagnosis</b>                                  | <b>Code</b>                                                                                       |
|-------------------|-----------------|---------------------------------------------------|---------------------------------------------------------------------------------------------------|
| ICD-10-CM         | Stroke          | Ischemic stroke                                   | I63.x, H34.1                                                                                      |
| ICD-10-PCS        | Intervention    | Mechanical thrombectomy for acute ischemic stroke | 03CG3Z7, 03CG3ZZ, 03CG4ZZ, 03CK3Z7, 03CK3ZZ, 03CL3Z7, 03CL3ZZ, 03CM3Z7, 03CM3ZZ, 03CN3Z7, 03CN3ZZ |

**Supplementary Table II.** Outcomes for AIS EVT patients with and without COVID-19, after stratification by age.

| Age (years)   | Death in COVID-19 negative (n, %) | Death in COVID-19 positive (n, %) | p value | Favorable discharge in COVID-19 negative (n, %) | Favorable discharge in COVID-19 positive (n, %) | p value |
|---------------|-----------------------------------|-----------------------------------|---------|-------------------------------------------------|-------------------------------------------------|---------|
| 18-50 (n=413) | 29, 7.5                           | suppressed                        | 0.429   | 306, 78.9                                       | 19, 76.0                                        | 0.734   |
| 51-64 (n=808) | 86, 11.2                          | 14, 36.8                          | <0.001  | 544, 70.7                                       | 17, 44.7                                        | 0.001   |
| 65-74 (n=790) | 90, 11.7                          | suppressed                        | 0.268   | 494, 64.1                                       | suppressed                                      | 0.056   |
| ≥75 (n=1,154) | 173, 15.3                         | 10, 45.5                          | <0.001  | 549, 48.5                                       | suppressed, lower percentage                    | 0.018   |

\* P values generated with Student's t-test or Fisher's exact, depending on cell size. Some values are suppressed for low count.

**Supplementary Table III.** Outcomes for AIS EVT patients with and without COVID-19, after stratification by average monthly AIS EVT patient volume.

| <b>Average monthly EVT volume</b>          | <b>Death in COVID-19 negative (n, %)</b> | <b>Death in COVID-19 positive (n, %)</b> | <b>p value</b> | <b>Favorable discharge in COVID-19 negative (n, %)</b> | <b>Favorable discharge in COVID-19 positive (n, %)</b> | <b>p value</b> |
|--------------------------------------------|------------------------------------------|------------------------------------------|----------------|--------------------------------------------------------|--------------------------------------------------------|----------------|
| <5 EVT patients a month (n=96 hospitals)   | 107, 14.5                                | suppressed, higher percentage            | 0.038          | 431, 58.6                                              | 12, 38.7                                               | 0.028          |
| 5-10 EVT patients a month (n=70 hospitals) | 171, 12.3                                | 16, 29.1                                 | <0.001         | 853, 61.5                                              | 30, 54.6                                               | 0.302          |
| >10 EVT patients a month (n=24 hospitals)  | 100, 10.7                                | suppressed, higher percentage            | 0.010          | 609, 65.0                                              | suppressed, lower percentage                           | 0.026          |

\* P values generated with Student's t-test or Fisher's exact, depending on cell size. Some values are suppressed for low count.
